# Supplementary material for: The relationship between body mass index and health-related quality of life in urban disadvantaged children
Source: Springer Nature journal article supplement (doi:10.1007/s11136-014-0634-7), 2014-01-28
Supplement: MOESM1 [file 281072]

| **Table 2 (supplementary): Pearson’s r correlations between all study variables** | | | | | | | | | | | | | |
| --- | --- | --- | --- | --- | --- | --- | --- | --- | --- | --- | --- | --- | --- |
| **Variables** | | 1 | 2 | 3 | 4 | 5 | 6 | 7 | 8 | 9 | 10 | 11 | 12 |
| 1 | Age |  |  |  |  |  |  |  |  |  |  |  |  |
| *2* | Gender | .12* |  |  |  |  |  |  |  |  |  |  |  |
| *3* | Family structure | .04 | -.10 |  |  |  |  |  |  |  |  |  |  |
| *4* | BMI z-scores | -.05 | .09 | .04 |  |  |  |  |  |  |  |  |  |
| *5* | Parent anxiety symptoms | .08 | .03 | .07 | -.08 |  |  |  |  |  |  |  |  |
| *6* | Parent depressive symptoms | .06 | -.04 | .00 | -.14* | .69** |  |  |  |  |  |  |  |
| 7 | Parent perceived social support | -.06 | -.02 | -.11 | .14* | -.17** | -.31** |  |  |  |  |  |  |
| 8 | Physical well-being | -.12 | .01 | -.03 | -.17** | .02 | .07 | .06 |  |  |  |  |  |
| 9 | Psychological well-being | -.05 | .03 | -.06 | -.12 | .01 | .02 | .03 | .52** |  |  |  |  |
| 10 | Autonomy & parent relations | .13* | -.09 | .03 | -.13* | .04 | .04 | .00 | .38** | .55** |  |  |  |
| *11* | Social support & peer relations | .07 | -.16** | .02 | -.12 | -.04 | .04 | .07 | .42** | .55** | .53** |  |  |
| *12*  *13* | School environment | -.17** | -.16* | -.04 | -.08 | -.01 | -.03 | .06 | .47** | .52** | .42** | .48** |  |
| Total HRQoL | .00 | -.03 | -.05 | -.15* | .02 | .02 | .09 | .68** | .75** | .72** | .65** | .67** |
| ** p<.05*  ***p <.01* | | | | | | | | | | | | | |
